# Supplementary material
Source: publisher site journal article supplement (https://www.dovepress.com/article/287156)
Supplement: Supplementary file 1 [file get_supplementary_file.php]

**Research Questionnaire**

**Frontline healthcare work force preparedness and readiness towards corona virus (COVID 19) in Sierra Leone. A quick online cross-sectional survey.**

The Survey is conducted by the f researchers ( Sulaiman Kanu, Peter Bai James, Abdulai Jawo Bah, John Alimamy Kabba, Musa Salieu Kamara, Christine Ellen Elleanor Williams and Joseph Sam Kanu) affiliated with the College of Medicine and Allied Health Sciences (COMAHS), University of Sierra Leone to assess the preparedness and readiness of frontline health workers with respect to their Knowledge, Attitude and Practices towards the COVID 19 Pandemic in Sierra Leone. The information is intended for use as a guide in informing decision makers in the fight against the Pandemic and to provide documented evidence.

Your participation in this study is voluntary and all information provided in this study will be kept confidential. Completion of questionnaire will take about 15 minutes and you can withdraw from the study at any point but your response to this questionnaire is essential to the successful completion of this project.

**INSTRUCTION: Please indicate with a Tick below:**

Are you willing to participate in the study? 1. Yes 2. No

**SECTION A: Respondent’s Demographic information**

A. Gender: 1. Male 2. Female

B. Age in years

1. 21-25 2. 26-30 3. 31-35 4. 36-40 5.41-45 6. >45

C. Marital status

1. Single 2. Married 3. Co-habiting 4.Divorced

D. Highest Level of education;

1. PhD 2. Masters 3. MBChB 4 B.Pharm (Hons).

5. Diploma 6. B.Sc. 7. Others (Please specify) ………………

**E. Designation**:

1. Doctor 2. Pharmacist 3. Nurse 4. Community Health officer

5. Laboratory Technician’s

**F. Years of Practice**

1. Less than (<) 2 year 2. 2-5 3. 6-10 4. >10

**G. Current Employment Status**

1. Directly involved in COVID19 patient care

2. Not directly involved in COVID19 patient care setting

**Section B:** **Knowledge, Attitude and Practice of Healthcare Workers towards COVID 19**.

| No. | | Questions on Knowledge | Options | | |
| --- | --- | --- | --- | --- | --- |
|  | | | True | False | I Don’t Know |
| K1 | A suspected case is a patient with acute respiratory illness and recent history of travel | |  |  |  |
| K2 | A person with laboratory confirmation of COVID 19 infection, irrespective of clinical signs and symptoms is a confirmed Case | |  |  |  |
| K3 | A suspected case is any patient with fever and at least cough or shortness of breath | |  |  |  |
| K4 | Any patient with a history of contact with a confirmed or probable COVID 19 case in the last 14 days prior to symptom onset is a suspected case | |  |  |  |
| K5 | The main clinical symptoms of COVID-19 are fever, fatigue, dry cough, and myalgia | |  |  |  |
| K6 | Unlike symptoms of common cold, stuffy nose, running nose, and sneezing are less common in persons infected with the SARS-COV-2 | |  |  |  |
| K7 | Eating Monkey, Bat or contacting wild animals would result in the infection by the SARS-COV-2 | |  |  |  |
| K8 | Patients with COVID-19 cannot spread the virus to others when they do not show signs and symptoms of the disease | |  |  |  |
| K9 | The SARS-COV-2 virus spreads via respiratory droplets of infected individual | |  |  |  |
| K10 | The incubation period of COVID-19 is 14days | |  |  |  |
| K11 | Children and young adults are less likely to be infected with COVID 19 thus, precautionary measures are not necessary to prevent the infection | |  |  |  |
| K12 | Not all patients infected with COVID-19 will develop severe cases | |  |  |  |
| K13 | Patients with underlying chronic disease conditions are at higher risk of infection and death from COVID 19 | |  |  |  |
| K14 | Avoiding handshakes, crowded places and public transportation could help to prevent COVID-19 | |  |  |  |
| K15 | Antibiotics are the first line of treatment when you suspect or have a confirmed case of COVID-19 | |  |  |  |
| K16 | Early recognition and supportive treatment help most patients recover from the infection since there is no effective cure for COVID-19 | |  |  |  |
| K17 | Isolation and treatment of people who are infected with the COVID-19 virus are effective ways to break the chain of transmission | |  |  |  |
| K18 | PPE and respiratory protection cannot effectively protect the users if it is not properly and consistently worn | |  |  |  |
| K19 | N95 filtering face piece respirators (FFRs) are designed to protect the wearer and surgical masks are designed to protect the patient | |  |  |  |

| NO. | Questions on Attitude | Yes | No | Not Sure |
| --- | --- | --- | --- | --- |
| A1 | Do you believe that social distancing and hand washing could prevent against COVID 19? |  |  |  |
| A2 | Do you have confidence in the current preventive measures put in place by Government to mitigate COVID 19? |  |  |  |
| A3 | Have you gone to any social event recently? |  |  |  |
| A4 | Are you confident to treat suspected case of COVID 19? |  |  |  |
| A5 | Do you think your facility has the capability to manage suspected COVID 19 patients? |  |  |  |
| A6 | Health insurance or incentives can motivate health care works directly involved in the management of COVID 19 patients? |  |  |  |
| A7 | If COVID-9 vaccine was available, would you take it? |  |  |  |

| NO. | Questions on Practice | Yes | No |
| --- | --- | --- | --- |
| P1 | Do you wash your hands and/or sanitize in between patients? |  |  |
| P2 | Do you regularly use facemask at point of care (when rendering service to sick patients)? |  |  |
| P3 | Do you use facemask when you have flu like symptoms? |  |  |
| P4 | In recent times, have you worn a face mask when leaving your home? |  |  |
| P5 | Do you use non-conventional remedies (Honey, garlic and lime) when you have flu like symptoms? |  |  |

**Section C: Preparedness questions on Availability of infrastructure, equipment and consumables.**

|  |  | **Yes** | **No** | **Don’t Know** |
| --- | --- | --- | --- | --- |
| **1** | Are there enough PPE (Gloves, N95 mask or surgical mask, face shield and disposal gowns) for use by all health staff in your facility? |  |  |  |
| **2** | Is there a designated area (Isolation Unit) in your place of work for suspected cases of COVID 19? |  |  |  |
| **3** | Does your hospital have a functioning wash service E.g. Running water, Veronica Buckers? |  |  |  |
| **4** | Do you have adequate disinfectant e.g. Chlorine, Alcohol hand based solutions in your facility? |  |  |  |
| **5** | Does your hospital have a proper waste disposal procedure? |  |  |  |
| **6** | Are there plans in place for rapid testing and management of health care workers who has contact with a confirmed COVID 19? |  |  |  |
| **7** | Does your facility have Oxygen concentrators and /or continuous positive airway pressure CPAP machine to manage COVID 19 patients with mild to moderate respiratory distress? |  |  |  |
| **8** | If there are cases of COVID 19 in your facility are there ventilators to manage the patients with worsening respiratory symptoms? |  |  |  |
| **9** | Have you had training on donning and doffing of light and heavy Personal protective equipment (PPE)? |  |  |  |
| **10** | Have you received formal training on COVID -19 case management and treatment protocols? |  |  |  |
| **11** | Do you think your facility has the capability to manage suspected COVID 19 patients? |  |  |  |

Thanks
